# Supplementary material
Source: MDPI journal article supplement (https://www.mdpi.com/1999-4907/12/10/1418)
Supplement: s1 [file s1]

## Supplementary materials

### **Microbial diversity and ecosystem functioning in deadwood of black pine of a temperate forest**

Roberta Pastorelli<sup>1\*</sup>, Alessandro Paletto<sup>2</sup>, Alessandro Elio Agnelli<sup>1</sup>, Alessandra Lagomarsino<sup>1</sup>,  
Isabella De Meo<sup>1</sup>,

<sup>1</sup> *Research Centre for Agriculture and Environment, Consiglio per la ricerca in agricoltura e l'analisi dell'economia agraria, via di Lanciola 12/A, 50125, Firenze, Italy.*

<sup>2</sup> *Research Centre for Forestry and Wood, Consiglio per la ricerca in agricoltura e l'analisi dell'economia agraria, piazza Nicolini 6, 38100, Trento, Italy.*

\* For correspondence. E-mail [roberta.pastorelli@crea.gov.it](mailto:roberta.pastorelli@crea.gov.it); Tel. +39-055-2492247.

**Table S1.** Description of visual characteristics used to assign the decay class.

| Decay class | Description                                                                                             |
|-------------|---------------------------------------------------------------------------------------------------------|
| 1           | Recently dead - small branches, wood texture intact, visible little rotten areas under bark             |
| 2           | Weakly decayed - twigs partly present, wood texture intact, rotten areas < 3cm                          |
| 3           | Medium decay - no twigs, wood texture partly broken, rotten area > 3cm                                  |
| 4           | Very decay - no twigs, wood soft, texture with blocky pieces, large rotten areas                        |
| 5           | Almost decomposed - no twigs, wood soft, powdery texture, very large rotten areas with musk and lichens |

Source: modified by Paletto and Tosi (2009).

**Table S2.** Primer pairs used for real time PCR absolute quantification of the different microbial groups assessed in the five deadwood decay classes.

| Target group          | Source for standard: plasmid containing a sequence of           | Primers                                         |
|-----------------------|-----------------------------------------------------------------|-------------------------------------------------|
| Bacteria              | 16S rDNA from <i>Pseudomonas nitroreducens</i> DSMZ1650         | 338F-518R (Sánchez <i>et al.</i> , 2007)        |
| Actinobacteria        | 16S rDNA from <i>Streptomyces</i> sp. A2                        | 243F-513R (Heuer <i>et al.</i> , 1997)          |
| Fungi                 | 18S rDNA from uncultured fungus from soil                       | EF390-FR1 (Vainio and Hantula, 2000)            |
| Methanogenic Archaea  | 16S rDNA from uncultured archaeon from rice soil                | Unimet1F-Unimet1R (Zhou <i>et al.</i> , 2009)   |
| Methanotrophs type I  | 16S rDNA from <i>Methylococcus capsulatus</i> ATCC33009         | MB10γ- 533R (Henckel <i>et al.</i> , 1999)      |
| Methanotrophs type II | 16S rDNA from <i>Methylocystis rosea</i> DSMZ17261              | MB9α- 533R (Henckel <i>et al.</i> , 1999)       |
| Diazotrophs           | <i>nifH</i> gene from <i>Sinorhizobium meliloti</i> strain A332 | polF-polR (Poly <i>et al.</i> , 2001)           |
| Nitrifying bacteria   | <i>amoA</i> gene from <i>Nitrosomonas europaea</i> NCIMB11850   | AmoA1F-AmoA2R (Xu <i>et al.</i> , 2012)         |
| Nitrifying archaea    | <i>amoA</i> gene from uncultured archaeon from soil             | archamoAF-archamoAR (Xu <i>et al.</i> , 2012)   |
| Denitrifying          | <i>nirK</i> gene from <i>Ochrobactrum anthropi</i> DSMZ6882     | F1ACu-R3Cu (Throback <i>et al.</i> , 2004)      |
| Denitrifying          | <i>nosZ</i> gene from <i>Pseudomonas stutzeri</i> DSMZ6082      | nosZF-nosZ1733R (Throback <i>et al.</i> , 2004) |

**Table S3.** Maximum values of CO<sub>2</sub>, CH<sub>4</sub> and N<sub>2</sub>O production from black pine deadwood cores under laboratory experiment. Mean values according to each decay classes are also reported (standard errors in parentheses). Different letters in a column indicate significant differences at P<0.05 (LSD test) among means.

| Decay class | Core                   | CO <sub>2</sub> max<br>(mg CO <sub>2</sub> g <sup>-1</sup> ) | CH <sub>4</sub> max<br>(mg CH <sub>4</sub> g <sup>-1</sup> ) | N <sub>2</sub> O max<br>(mg N <sub>2</sub> O g <sup>-1</sup> ) |
|-------------|------------------------|--------------------------------------------------------------|--------------------------------------------------------------|----------------------------------------------------------------|
| <b>1</b>    | 1                      | 1.49                                                         | 5.2 10 <sup>-7</sup>                                         | -4.3 10 <sup>-6</sup>                                          |
|             | 2                      | 0.38                                                         | 5.4 10 <sup>-7</sup>                                         | -4.4 10 <sup>-6</sup>                                          |
|             | 3                      | 1.11                                                         | 4.4 10 <sup>-6</sup>                                         | -6.8 10 <sup>-6</sup>                                          |
|             | 4                      | 0.63                                                         | 9.7 10 <sup>-6</sup>                                         | -4.1 10 <sup>-6</sup>                                          |
|             | <b>mean (st error)</b> | <b>0.90 (0.25) bc</b>                                        | <b>3.8 10<sup>-6</sup> (2.2 10<sup>-6</sup>)</b>             | <b>-4.9 10<sup>-6</sup> (6.4 10<sup>-7</sup>)</b>              |
| <b>2</b>    | 5                      | 0.22                                                         | -2.6 10 <sup>-6</sup>                                        | -7.7 10 <sup>-6</sup>                                          |
|             | 6                      | 0.81                                                         | 2.7 10 <sup>-7</sup>                                         | -1.6 10 <sup>-5</sup>                                          |
|             | 7                      | 0.66                                                         | 1.7 10 <sup>-5</sup>                                         | -7.3 10 <sup>-6</sup>                                          |
|             | 8                      | 0.31                                                         | 7.0 10 <sup>-7</sup>                                         | -4.6 10 <sup>-6</sup>                                          |
|             | <b>mean (st error)</b> | <b>0.50 (0.14) c</b>                                         | <b>3.9 10<sup>-6</sup> (4.5 10<sup>-6</sup>)</b>             | <b>-8.8 10<sup>-6</sup> (2.4 10<sup>-6</sup>)</b>              |
| <b>3</b>    | 9                      | 2.07                                                         | -3.8 10 <sup>-8</sup>                                        | 1.5 10 <sup>-4</sup>                                           |
|             | 10                     | 1.12                                                         | 4.4 10 <sup>-6</sup>                                         | -1.3 10 <sup>-5</sup>                                          |
|             | 11                     | 1.04                                                         | 5.4 10 <sup>-6</sup>                                         | -6.3 10 <sup>-6</sup>                                          |
|             | 12                     | 0.93                                                         | 6.3 10 <sup>-4</sup>                                         | -8.0 10 <sup>-6</sup>                                          |
|             | <b>mean (st error)</b> | <b>1.29 (0.26) ab</b>                                        | <b>1.6 10<sup>-4</sup> (1.6 10<sup>-4</sup>)</b>             | <b>3.1 10<sup>-5</sup> (4.0 10<sup>-5</sup>)</b>               |
| <b>4</b>    | 13                     | 1.42                                                         | -2.1 10 <sup>-7</sup>                                        | -9.3 10 <sup>-6</sup>                                          |
|             | 14                     | 1.25                                                         | 9.9 10 <sup>-7</sup>                                         | -1.3 10 <sup>-5</sup>                                          |
|             | 15                     | 1.88                                                         | 5.1 10 <sup>-6</sup>                                         | -3.2 10 <sup>-6</sup>                                          |
|             | 16                     | 1.53                                                         | -2.1 10 <sup>-6</sup>                                        | -9.3 10 <sup>-6</sup>                                          |
|             | <b>mean (st error)</b> | <b>1.52 (0.13) ab</b>                                        | <b>9.3 10<sup>-7</sup> (1.5 10<sup>-6</sup>)</b>             | <b>-8.8 10<sup>-6</sup> (2.1 10<sup>-6</sup>)</b>              |
| <b>5</b>    | 17                     | 0.99                                                         | 6.6 10 <sup>-7</sup>                                         | -4.4 10 <sup>-6</sup>                                          |
|             | 18                     | 1.54                                                         | -8.2 10 <sup>-7</sup>                                        | -1.7 10 <sup>-5</sup>                                          |
|             | 19                     | 2.83                                                         | -2.4 10 <sup>-6</sup>                                        | -1.7 10 <sup>-5</sup>                                          |
|             | 20                     | 1.68                                                         | -7.3 10 <sup>-6</sup>                                        | -4.2 10 <sup>-5</sup>                                          |
|             | <b>mean (st error)</b> | <b>1.76 (0.39) a</b>                                         | <b>-2.5 10<sup>-6</sup> (1.7 10<sup>-6</sup>)</b>            | <b>-2.0 10<sup>-5</sup> (7.8 10<sup>-6</sup>)</b>              |

**Table S4.** ANOSIM and PERMANOVA global test based on the Bray-Curtis similarity matrices of 18S- and 16S-rDNA DGGE, for microbial groups (fungi, bacteria, and actinobacteria) decaying downy birch deadwood.

|                | ANOSIM |        | PERMANOVA |        |
|----------------|--------|--------|-----------|--------|
|                | R      | P      | F         | P      |
| Fungi          | 0.66   | 0.0001 | 2.77      | 0.0001 |
| Bacteria       | 0.63   | 0.0001 | 3.87      | 0.0001 |
| Actinobacteria | 0.54   | 0.0001 | 3.75      | 0.0001 |

**Table S5.** Values of ANOSIM statistic R (upper right side) and PERMANOVA statistic F (lower left side) from pairwise comparison of the banding profiles of fungal 18S-rDNA DGGE, and bacterial and actinobacterial 16S-rDNA DGGEs.

| <i>Fungi</i>          | Class 1 | Class 2 | Class 3 | Class 4 | Class 5 |
|-----------------------|---------|---------|---------|---------|---------|
| Class 1               |         | 0.68*   | 0.77*   | 0.77*   | 0.99*   |
| Class 2               | 2.77*   |         | 0.58*   | 0.57*   | 0.91*   |
| Class 3               | 2.72*   | 2.00*   |         | 0.25    | 0.51*   |
| Class 4               | 3.19*   | 2.26*   | 1.57    |         | 0.56    |
| Class 5               | 5.75*   | 3.71*   | 2.15*   | 2.78    |         |
| <i>Bacteria</i>       |         |         |         |         |         |
| Class 1               |         | 0.72*   | 0.73*   | 0.82*   | 0.70*   |
| Class 2               | 2.91*   |         | 0.92*   | 0.85*   | 0.89*   |
| Class 3               | 4.69*   | 5.42*   |         | 0.76*   | 0.56*   |
| Class 4               | 5.44*   | 5.37*   | 3.71*   |         | 0.32*   |
| Class 5               | 3.21*   | 3.80*   | 2.53*   | 1.75*   |         |
| <i>Actinobacteria</i> |         |         |         |         |         |
| Class 1               |         | 0.64*   | 0.74*   | 0.90*   | 0.85*   |
| Class 2               | 2.49*   |         | -0.06   | 0.42*   | 0.65*   |
| Class 3               | 3.051*  | 0.67    |         | 0.89*   | 0.91*   |
| Class 4               | 5.85*   | 2.92*   | 6.37*   |         | 0.44    |
| Class 5               | 5.15*   | 3.77*   | 5.85*   | 3.12*   |         |

\*Significant value ( $P < 0.05$ )

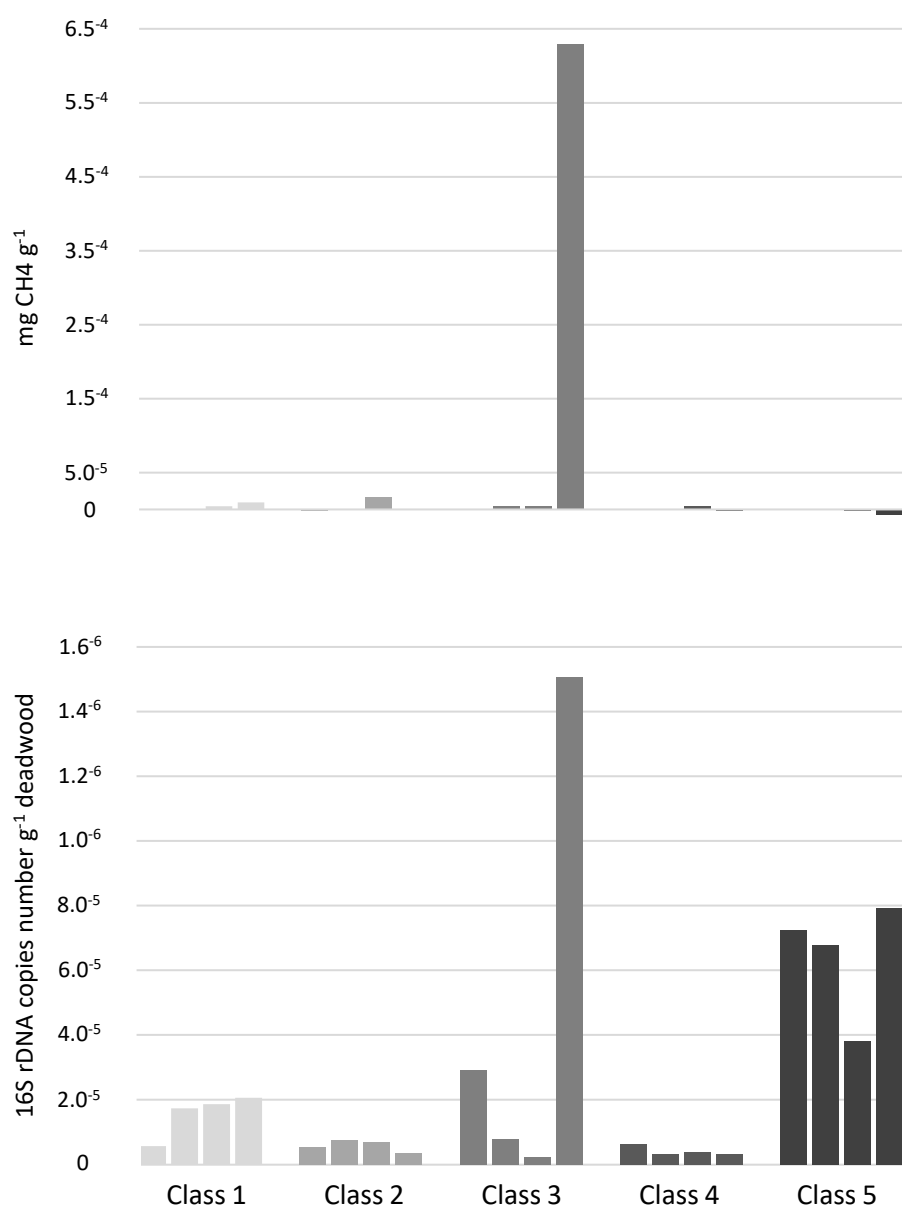

**Figure S1.** Maximum values of CH<sub>4</sub> production (top) and archaeal methanogen 16S rDNA gene copies number (bottom) from each black pine deadwood sample.

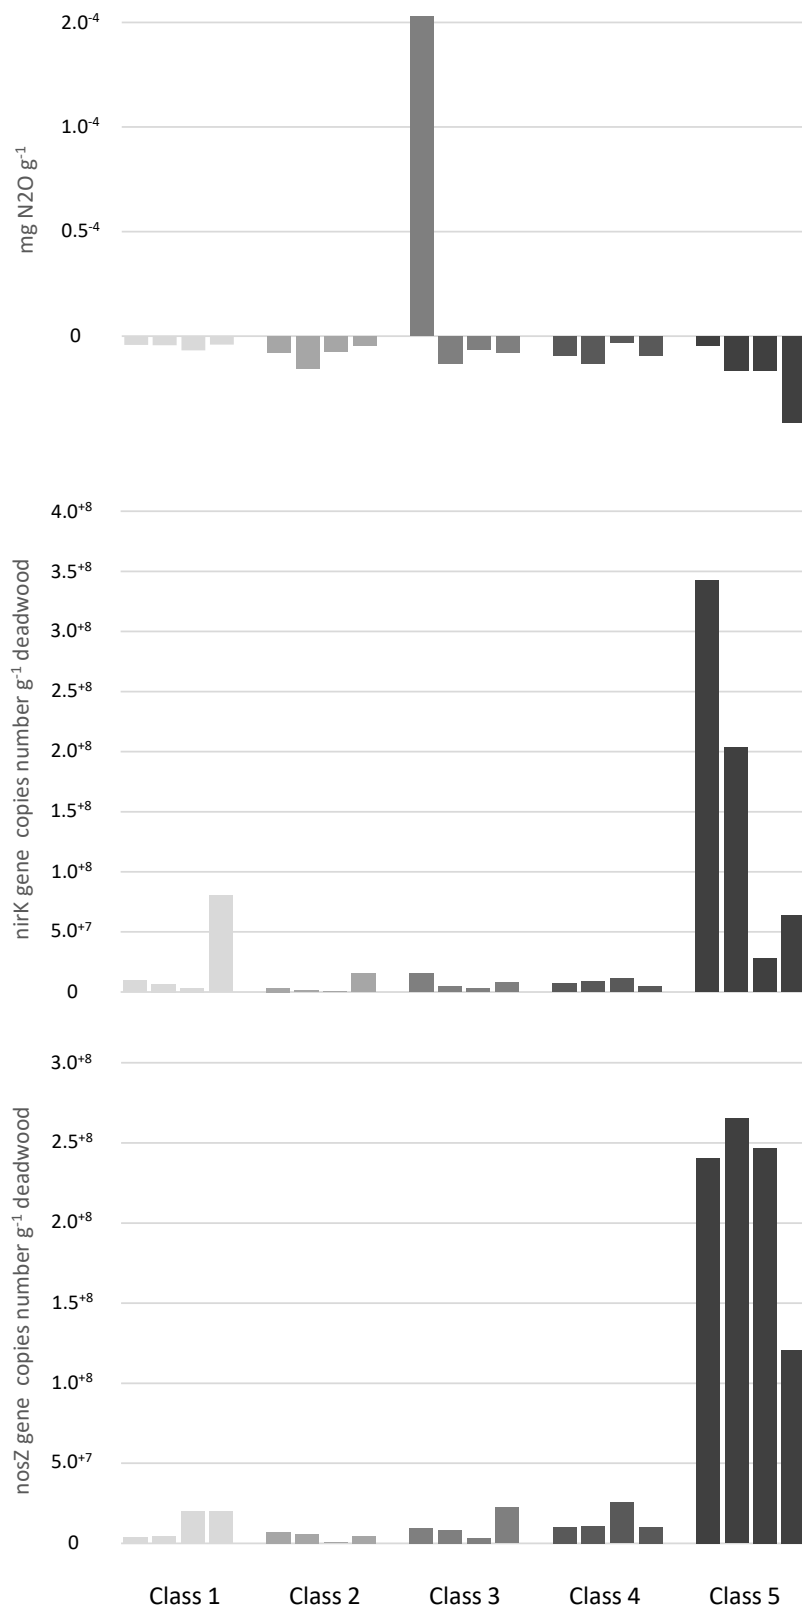

**Figure S2.** Maximum values of N<sub>2</sub>O production (top) and nirK gene (middle) and nosZ gene (bottom) copies number (bottom) from each black pine deadwood sample.

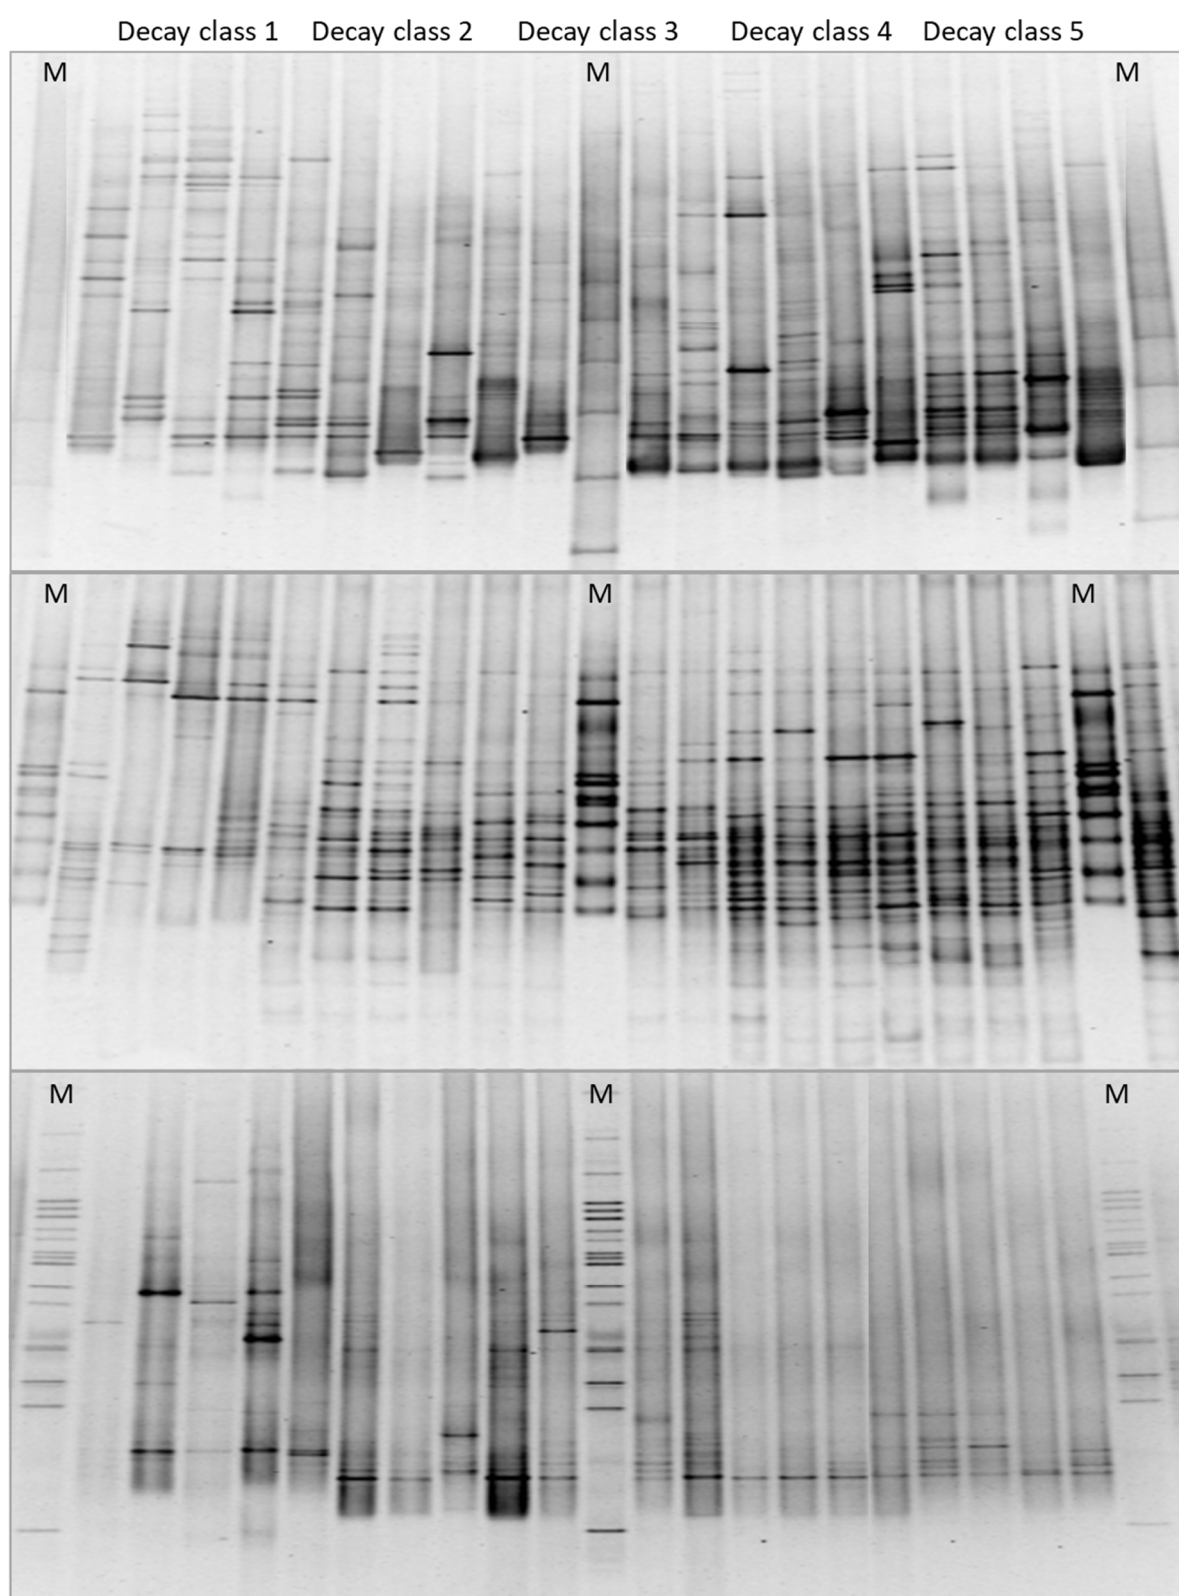

**Figure S3.** DGGE profiles of fungal 18S rDNA gene fragments (top), bacterial 16S rDNA gene fragments (middle), and actinobacterial 16S rDNA gene fragments (bottom). The letter M on the gel images indicates the marker used for normalization of bands.

## REFERENCES

- Henckel T, Friedrich M, Conrad R. Molecular analyses of the methane-oxidizing microbial community in rice field soil by targeting the genes of the 16S rRNA, particulate methane monooxygenase, and methanol dehydrogenase. *Appl Environ Microbiol* 1999;**65**:1980-1990.
- Heuer H, Krsek M, Baker P, Smalla K, Wellington EM. Analysis of actinomycete communities by specific amplification of genes encoding 16S rRNA and gel-electrophoretic separation in denaturing gradients. *Appl Environ Microbiol* 1997;**63**:3233-3241.
- Paletto A, Tosi V. Forest canopy cover and canopy closure: Comparison of assessment techniques. *Eur J For Res* 2009;**128**:265–272.
- Poly F, Monrozier LJ, Bally R. Improvement in the RFLP procedure for studying the diversity of *nifH* genes in communities of nitrogen fixers in soil. *Res Microbiol* 2001;**152**:95-103.
- Sánchez O, Gasol JM, Massana R, Mas J, Pedrós-Alió C. Comparison of different denaturing gradient gel electrophoresis primer sets for the study of marine bacterioplankton communities. *Appl Environ Microbiol* 2007;**73**:5962-5967.
- Throbäck IN, Enwall K, Jarvis Å, Hallin S. Reassessing PCR primers targeting *nirS*, *nirK* and *nosZ* genes for community surveys of denitrifying bacteria with DGGE. *FEMS Microbiol Ecol* 2004;**49**:401–417.
- Vainio E, Hantula J. Direct analysis of wood-inhabiting fungi using denaturing gradient gel electrophoresis of amplified ribosomal DNA. *Mycol Res* 2000;**104**:927-936.
- Xu Y, Yu W, Ma Q, Zhou H. Responses of bacterial and archaeal ammonia oxidisers of an acidic luvisols soil to different nitrogen fertilization rates after 9 years. *Biol Fertil Soils* 2012;**48**:827–837.
- Zhou M, Hernandez-Sanabria E, Guan LL. Assessment of the microbial ecology of ruminal methanogens in cattle with different feed efficiencies. *App Environ Microbiol* 2009;**75**:6524-6533.
